# Supplementary material for: Transcriptome and Metabolite analysis reveal candidate genes of the cardiac glycoside biosynthetic pathway from Calotropis procera
Source: PubMed Central journal article supplement (PMC5050527; doi:10.1038/srep34464), 2016-10-05
Supplement: srep34464-s1.pdf [file srep34464-s1.pdf]

**Transcriptome and Metabolite analysis reveal candidate genes of cardiac glycoside biosynthetic pathway from *Calotropis procera***

Akansha Pandey<sup>1</sup>, Vishakha Swarnkar<sup>1#</sup>, Tushar Pandey<sup>1#</sup>, Piush Srivastava<sup>1</sup>, Sanjeev Kanojiya<sup>2</sup>, DK Mishra<sup>1</sup>, Vineeta Tripathi<sup>1\*</sup>

<sup>1</sup>Botany division, CSIR-CDRI, Sector 10, Jankipuram Extension, Sitapur Road, Lucknow 226031, Uttar Pradesh, INDIA, <sup>2</sup> Sophisticated Analytical Instrument, CSIR-CDRI, Sector 10, Jankipuram Extension, Sitapur Road, Lucknow 226031, Uttar Pradesh, INDIA

**#authors contributed equally**

**Supplementary Figure S1. Length distribution of contigs assembled in *C. procera*.** The number of 12 groups of unigenes with different length is shown.

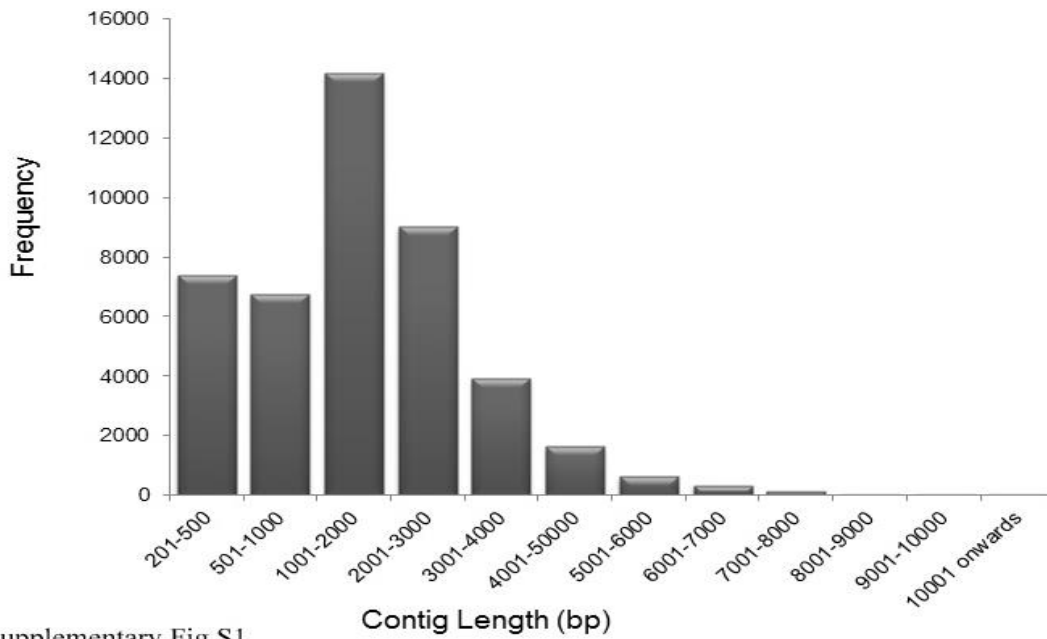

Supplementary Fig S1

**Supplementary Figure S2. Characteristic of homology search of assembled unigenes.** A-E-value distribution of top Blast hits. B- Similarity distribution of unigenes. C-Species distribution of Blast hits.

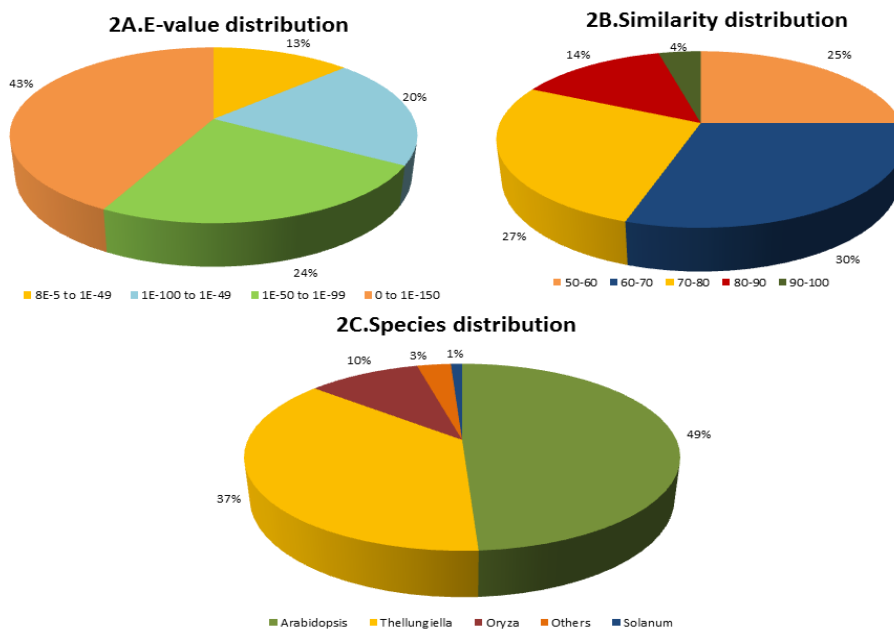

**Supplementary Figure S3:** Structure and spectra chromatogram of cardiac glycosides and genin units with their proposed fragmentation pattern.

| S. No. | RT   | M.W. | Identified     | <i>m/z</i> (Characteristic fragment ions of genin unit) | Genin unit | Sugar unit |
|--------|------|------|----------------|---------------------------------------------------------|------------|------------|
| 01     | 5.34 | 404  | Calotropagenin | 387,369,351,341,333,323,305                             | A          | -          |

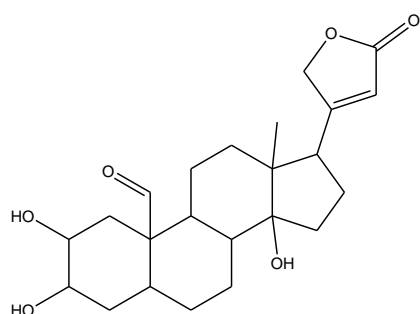

Calotropagenin  
 Chemical Formula: C<sub>23</sub>H<sub>32</sub>O<sub>6</sub>  
 Exact Mass: 404.2199  
 Molecular Weight: 404.4966

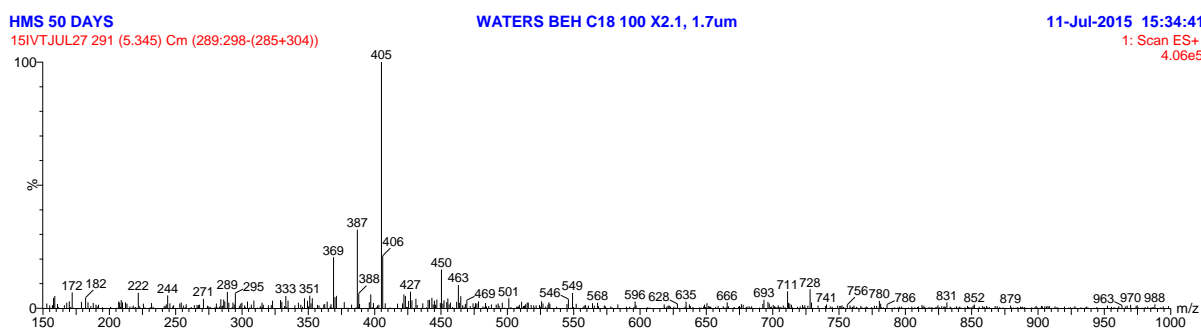

LC-ESI-MS Spectrum of Calotropagenin *m/z* 405 [M+H]<sup>+</sup>

| <i>m/z</i> | Annotation           | Mass difference | Confirmation remark  |
|------------|----------------------|-----------------|----------------------|
| 405        | [M+ H] <sup>+</sup>  | 1Da             | Molecular weight 404 |
| 427        | [M+ Na] <sup>+</sup> | 23 Da           | Da                   |

| Accurate mass observed | Annotation          | Calc. mass of Calotropagenin [M+ H] <sup>+</sup> | Mass difference In mmu | Confirmation remark                                                                            |
|------------------------|---------------------|--------------------------------------------------|------------------------|------------------------------------------------------------------------------------------------|
| 405.2270               | [M+ H] <sup>+</sup> | 405.2272                                         | 0.0002                 | Molecular formula of the compounds C <sub>23</sub> H <sub>33</sub> O <sub>6</sub> <sup>+</sup> |

MMS 51 DAYS[MS/MS]  
15IVTJUL34 913 (5.331) Cm (877:935)

WATERS BEH C18 100 X2.1, 1.7um

24-Jul-2015 09:49:08  
1: Daughters of 405ES+  
3.08e3

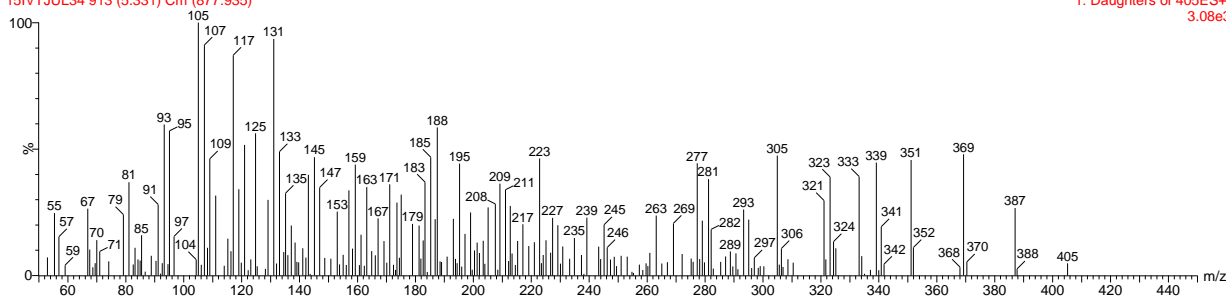

LC-ESI-MS/MS Spectrum of Calotropagenin  $m/z$  405  $[M+H]^+$  recorded at 30-20eV collision energy

Reference LC-ESI-MS/MS Spectrum (Phytochem Anal, 2012. 23(2): p. 117-25)

LCMSMS8OCT01 249 (9.974) Cm (239:256)

1: Daughters of 405ES+  
139

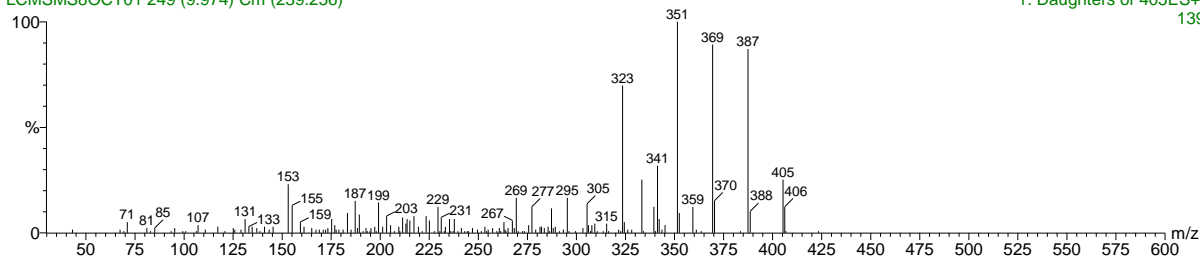

Previously published LC-ESI-MS/MS Spectrum of Calotropagenin  $m/z$  405  $[M+H]^+$  recorded at 15-5eV collision energy

| $m/z$ | Annotation          | Neutral losses in Da |
|-------|---------------------|----------------------|
| 387   | $[M+ H-H_2O]^+$     | 18                   |
| 369   | $[M+ H-2H_2O]^+$    | 36                   |
| 359   | $[M+ H-H_2O+CO]^+$  | 46                   |
| 351   | $[M+ H-3H_2O]^+$    | 54                   |
| 341   | $[M+ H-2H_2O+CO]^+$ | 64                   |
| 333   | $[M+ H-4H_2O]^+$    | 72                   |
| 323   | $[M+ H-3H_2O+CO]^+$ | 82                   |

All the above neutral losses can be predicted from structure of calotropagenin as proposed in fragmentation pattern.

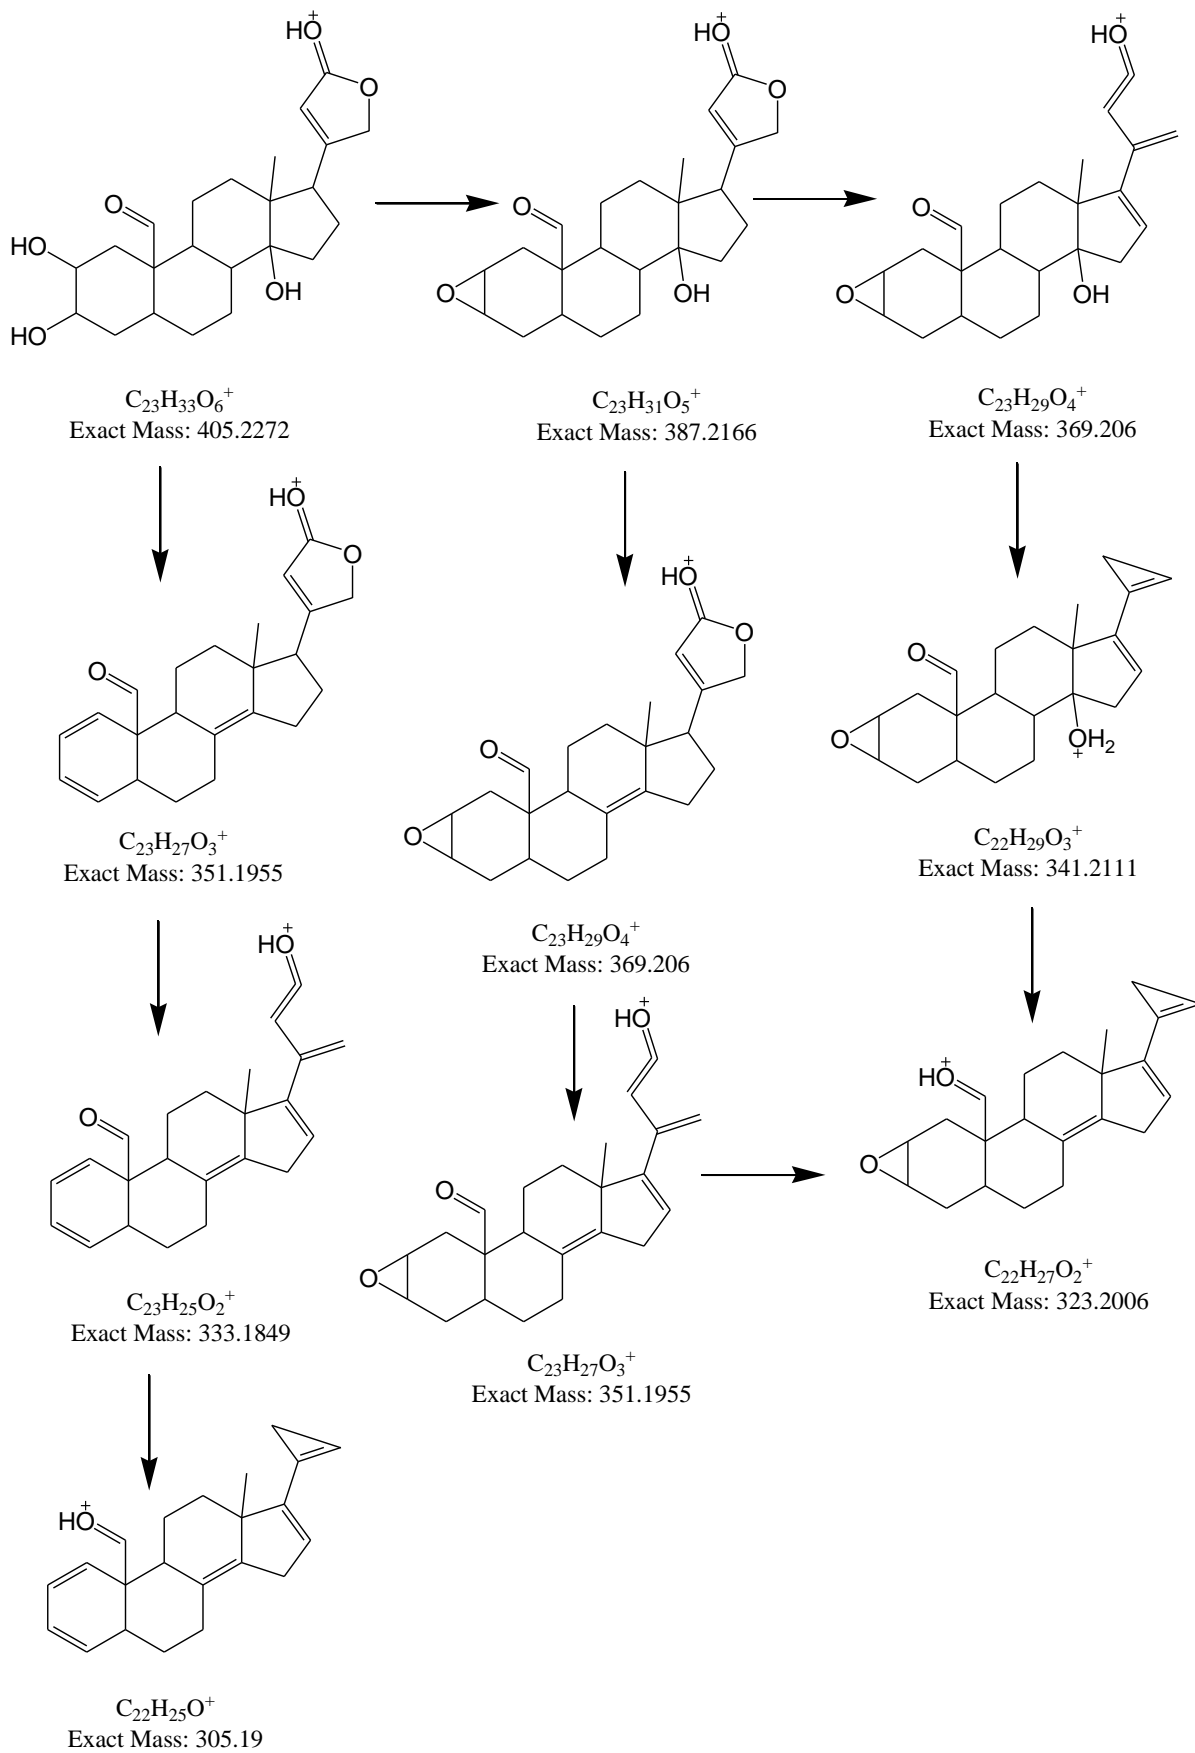

Proposed fragmentation pattern of Calotropagenin  $m/z$  405  $[M+H]^+$

| S. No. | RT   | M.W. | Identified | <i>m/z</i> (Characteristic fragment ions of genin unit) | Genin unit | Sugar unit |
|--------|------|------|------------|---------------------------------------------------------|------------|------------|
| 02     | 6.78 | 536  | Frugoside  | 391,373,355,339,337,325                                 | C          | 146        |

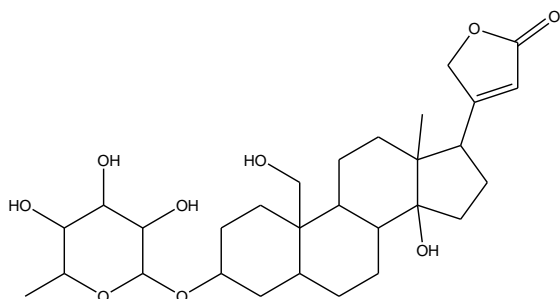

Frugoside  
 Chemical Formula: C<sub>29</sub>H<sub>44</sub>O<sub>9</sub>  
 Exact Mass: 536.2985  
 Molecular Weight: 536.6543

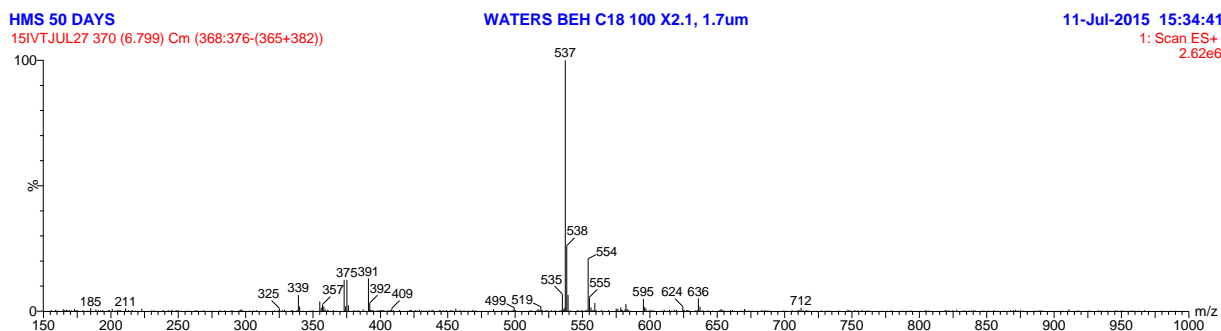

LC-ESI-MS Spectrum of frugoside *m/z* 537 [M+H]<sup>+</sup>

| <i>m/z</i> | Annotation                         | Mass difference | Confirmation remark           |
|------------|------------------------------------|-----------------|-------------------------------|
| 537        | [M+ H] <sup>+</sup>                | 1Da             | Molecular weight 536          |
| 554        | [M+ NH <sub>4</sub> ] <sup>+</sup> | 18 Da           | Da                            |
| 391        | [M+ H-glycone] <sup>+</sup>        | 146 Da          | Cleavage of –O-glycoside bond |

| Accurate mass observed | Annotation          | Calculated mass of Frugoside [M+ H] <sup>+</sup> | Mass difference In mmu | Confirmation remark                                                                            |
|------------------------|---------------------|--------------------------------------------------|------------------------|------------------------------------------------------------------------------------------------|
| 537.3057               | [M+ H] <sup>+</sup> | 537.3058                                         | 0.0001                 | Molecular formula of the compounds C <sub>29</sub> H <sub>45</sub> O <sub>9</sub> <sup>+</sup> |

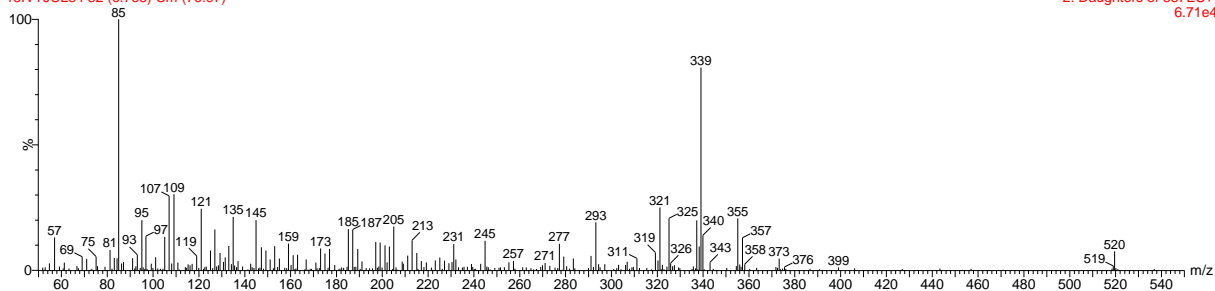

LC-ESI-MS/MS Spectrum of frugoside  $m/z$  537  $[M+H]^+$  recorded at 30-20eV collision energy  
[characteristic fragment ions from genin observed  $m/z$  373,355,339/337, 325]

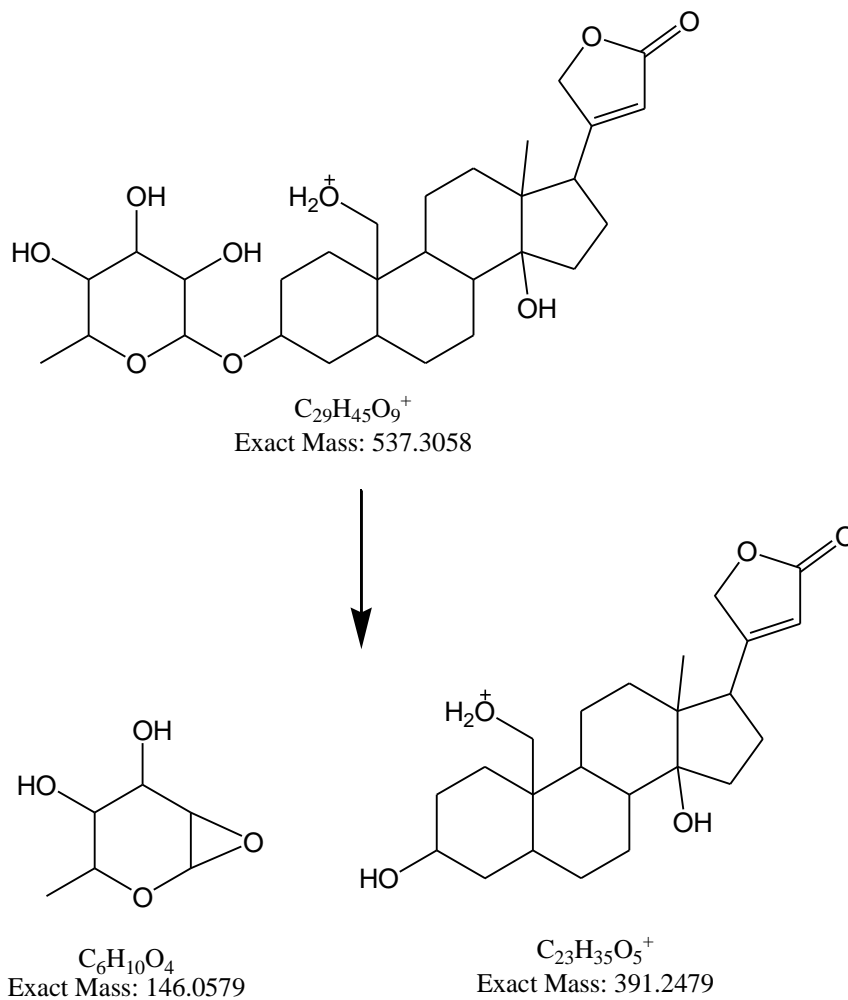

Proposed fragmentation pattern of Frugoside  $m/z$  537  $[M+H]^+$

| S. No. | RT   | M.W. | Identified      | <i>m/z</i> (Characteristic fragment ions of genin unit) | Genin unit | Sugar unit |
|--------|------|------|-----------------|---------------------------------------------------------|------------|------------|
| 03     | 6.89 | 390  | Coroglaucigenin | 373,355,337, 325                                        | C          | -          |

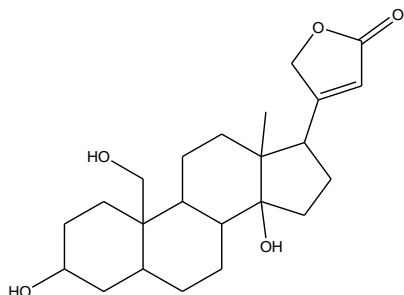

Coroglaucigenin  
 Chemical Formula: C<sub>23</sub>H<sub>34</sub>O<sub>5</sub>  
 Exact Mass: 390.2406  
 Molecular Weight: 390.5131

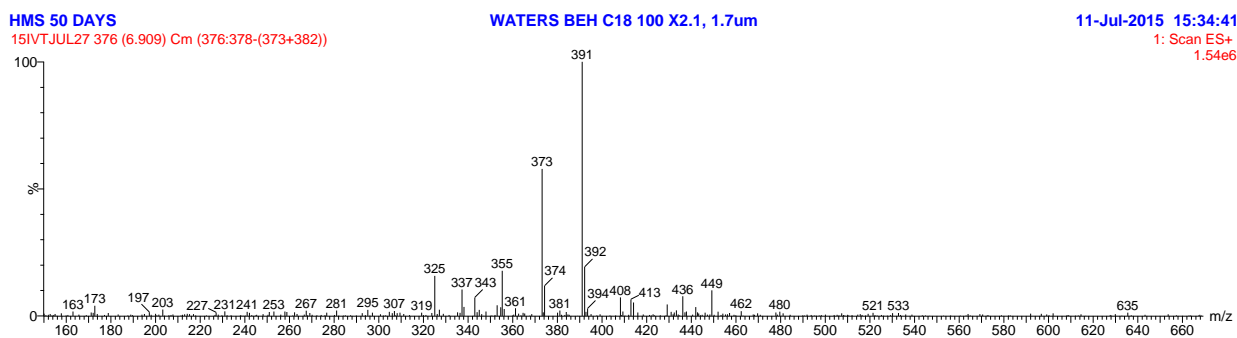

LC-ESI-MS Spectrum of coroglaucigenin *m/z* 391 [M+H]<sup>+</sup>

| <i>m/z</i> | Annotation                         | Mass difference | Confirmation remark  |
|------------|------------------------------------|-----------------|----------------------|
| 391        | [M+ H] <sup>+</sup>                | 1Da             | Molecular weight 390 |
| 408        | [M+ NH <sub>4</sub> ] <sup>+</sup> | 18 Da           | Da                   |

| Accurate mass observed | Annotation          | Calc. mass of coroglaucigenin [M+ H] <sup>+</sup> | Mass difference In mmu | Confirmation remark                                                                            |
|------------------------|---------------------|---------------------------------------------------|------------------------|------------------------------------------------------------------------------------------------|
| 391.2478               | [M+ H] <sup>+</sup> | 391.2479                                          | 0.0001                 | Molecular formula of the compounds C <sub>23</sub> H <sub>35</sub> O <sub>5</sub> <sup>+</sup> |



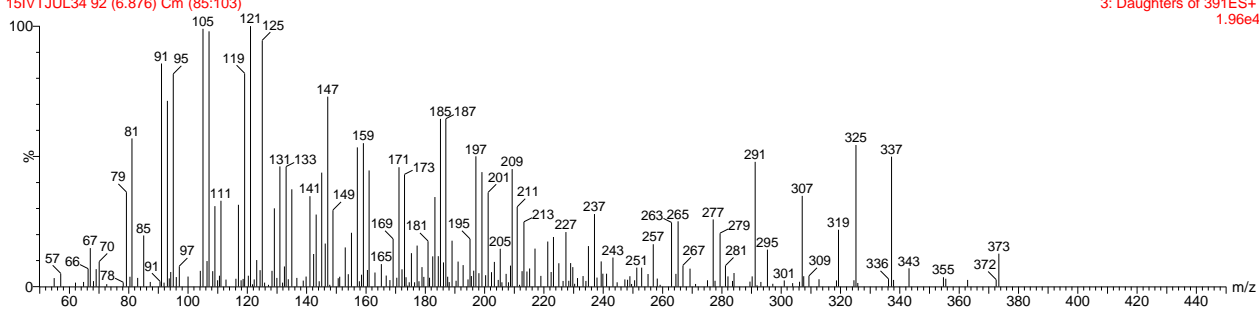

LC-ESI-MS/MS Spectrum of coroglaucigenin  $m/z$  391  $[M+H]^+$  recorded at 30-20ev collision energy [characteristic fragment ions from genin observed  $m/z$  373, 355, 337, 325 ]

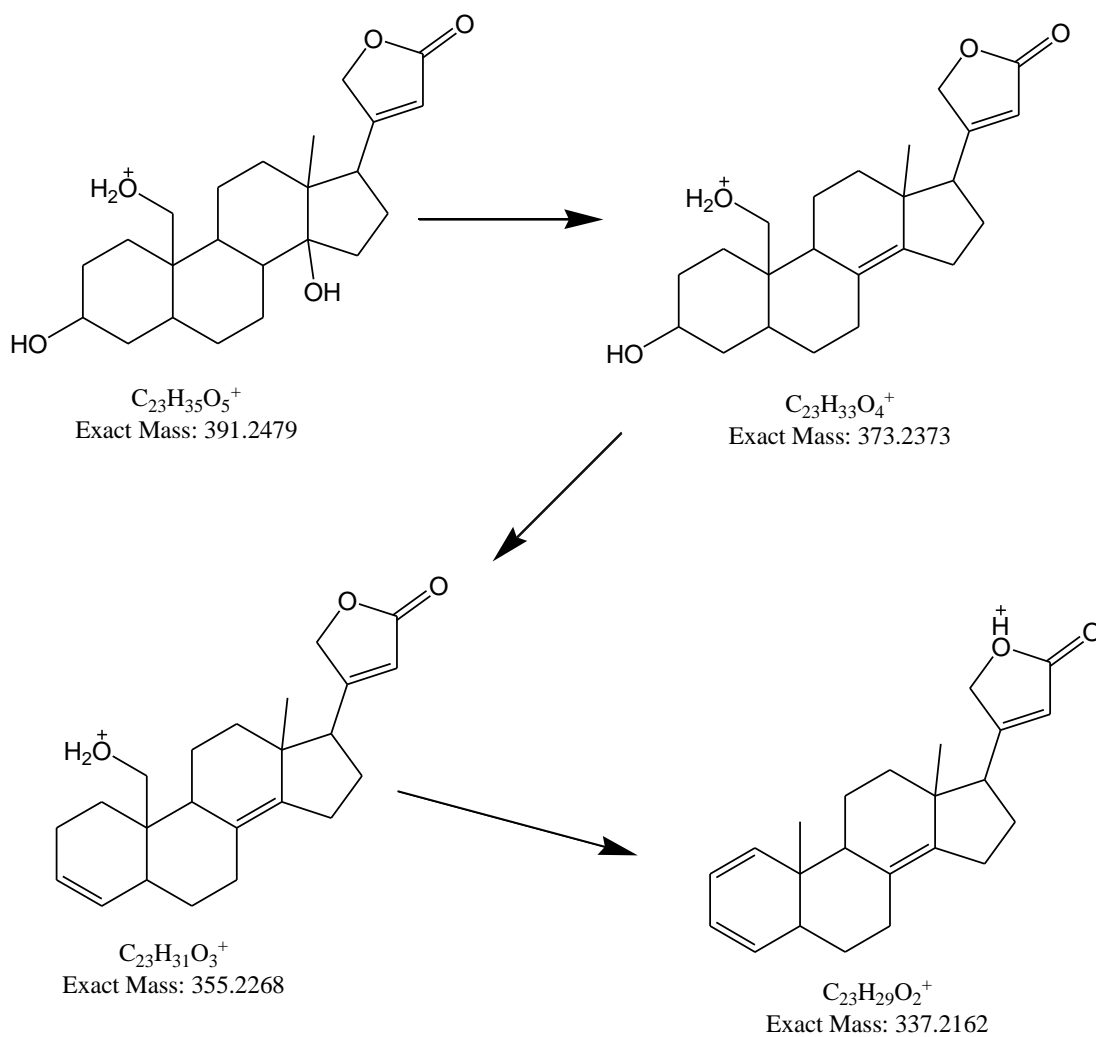

Proposed fragmentation pattern coroglaucigenin  $m/z$  391  $[M+H]^+$

| S. No. | RT   | M.W. | Identified | <i>m/z</i> (Characteristic fragment ions of genin unit) | Genin unit | Sugar unit |
|--------|------|------|------------|---------------------------------------------------------|------------|------------|
| 04     | 7.85 | 532  | Calotropin | 387,369,359,351,341,333,323                             | A          | 146        |

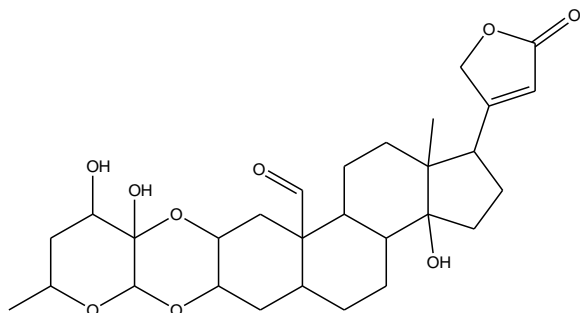

Calotropin  
 Chemical Formula: C<sub>29</sub>H<sub>40</sub>O<sub>9</sub>  
 Exact Mass: 532.2672  
 Molecular Weight: 532.6225

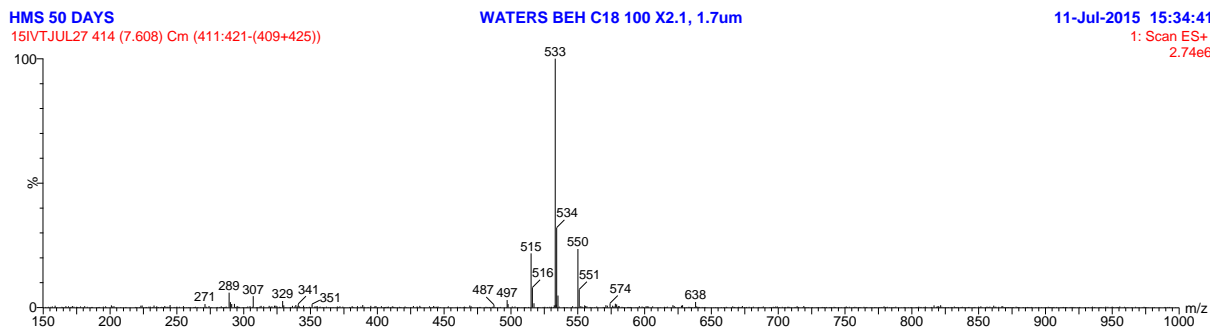

LC-ESI-MS Spectrum of calotropin *m/z* 533 [M+H]<sup>+</sup>

| <i>m/z</i> | Annotation                         | Mass difference | Confirmation remark  |
|------------|------------------------------------|-----------------|----------------------|
| 533        | [M+ H] <sup>+</sup>                | 1Da             | Molecular weight 532 |
| 550        | [M+ NH <sub>4</sub> ] <sup>+</sup> | 18 Da           | Da                   |

| Accurate mass observed | Annotation          | Calc. mass of Calotropin [M+ H] <sup>+</sup> | Mass difference In mmu | Confirmation remark                                                                            |
|------------------------|---------------------|----------------------------------------------|------------------------|------------------------------------------------------------------------------------------------|
| 533.2745               | [M+ H] <sup>+</sup> | 533.2745                                     | 0.0000                 | Molecular formula of the compounds C <sub>29</sub> H <sub>41</sub> O <sub>9</sub> <sup>+</sup> |

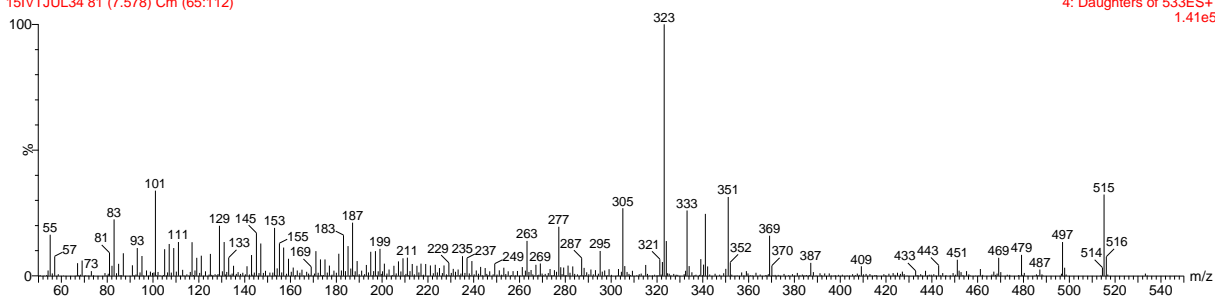

LC-ESI-MS/MS Spectrum of calotropin  $m/z$  533  $[M+H]^+$  recorded at 30-20ev collision energy  
[characteristic fragment ions from genin observed  $m/z$  387,369, 351,341,333,323,305]

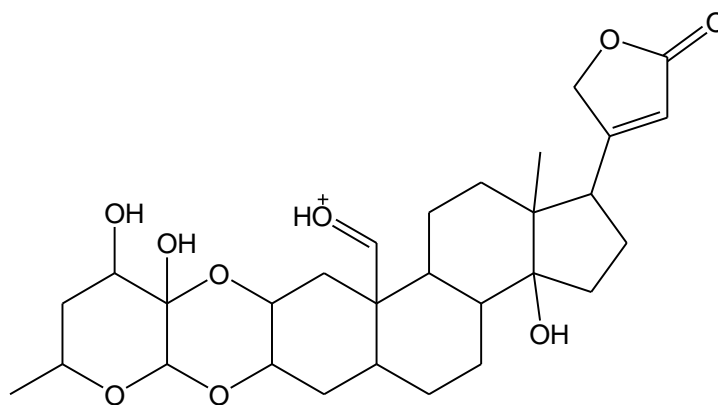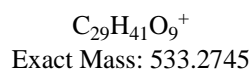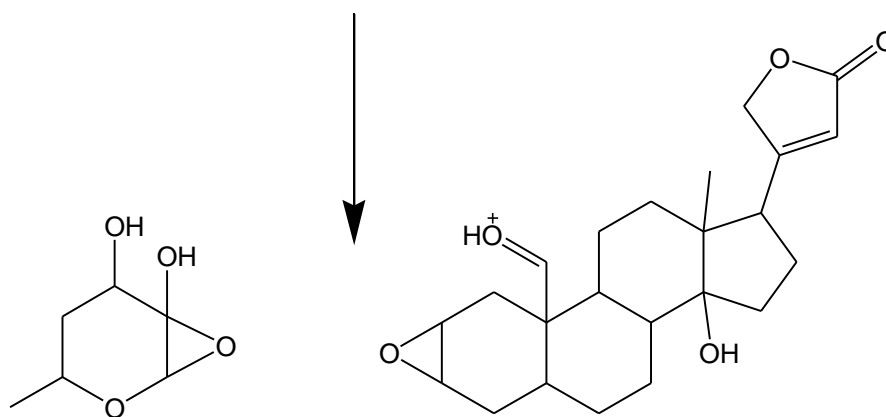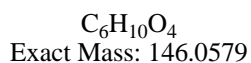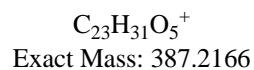

Proposed fragmentation pattern of calotropin  $m/z$  533  $[M+H]^+$

| S. No. | RT   | M.W. | Identified | <i>m/z</i> (Characteristic fragment ions of genin unit) | Genin unit | Sugar unit |
|--------|------|------|------------|---------------------------------------------------------|------------|------------|
| 05     | 9.04 | 374  | Uzarigenin | 357,339,321,293                                         | B          | -          |

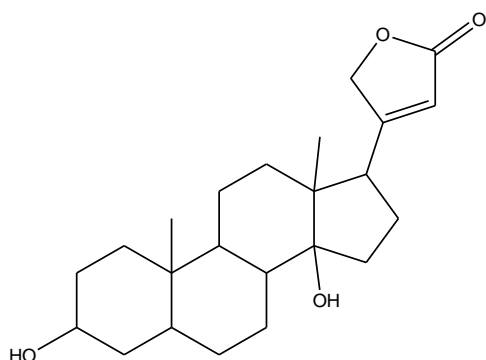

Uzarigenin  
 Chemical Formula: C<sub>23</sub>H<sub>34</sub>O<sub>4</sub>  
 Exact Mass: 374.2457  
 Molecular Weight: 374.5137

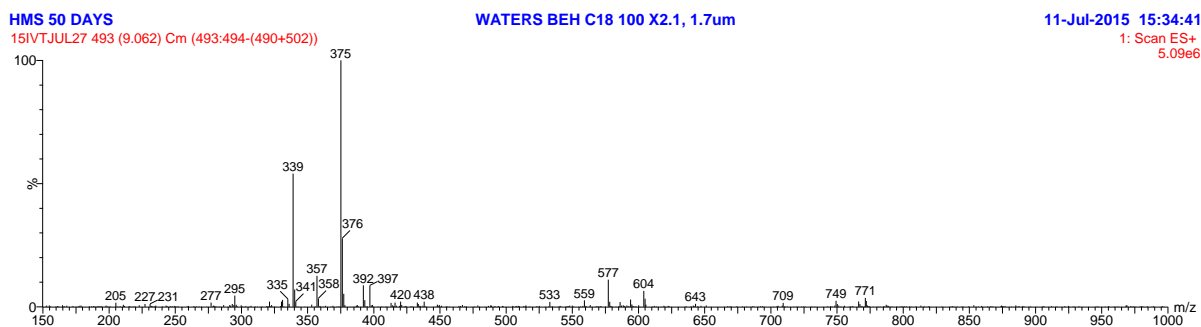

LC-ESI-MS Spectrum of uzarigenin *m/z* 375 [M+H]<sup>+</sup>

| <i>m/z</i> | Annotation                         | Mass difference | Confirmation remark  |
|------------|------------------------------------|-----------------|----------------------|
| 375        | [M+ H] <sup>+</sup>                | 1Da             | Molecular weight 374 |
| 392        | [M+ NH <sub>4</sub> ] <sup>+</sup> | 18 Da           | Da                   |
| 397        | [M+ Na] <sup>+</sup>               | 23 Da           |                      |

| Accurate mass observed | Annotation          | Calc. mass of uzarigenin [M+ H] <sup>+</sup> | Mass difference In mmu | Confirmation remark                                                                            |
|------------------------|---------------------|----------------------------------------------|------------------------|------------------------------------------------------------------------------------------------|
| 375.2531               | [M+ H] <sup>+</sup> | 375.2530                                     | 0.0001                 | Molecular formula of the compounds C <sub>23</sub> H <sub>35</sub> O <sub>4</sub> <sup>+</sup> |

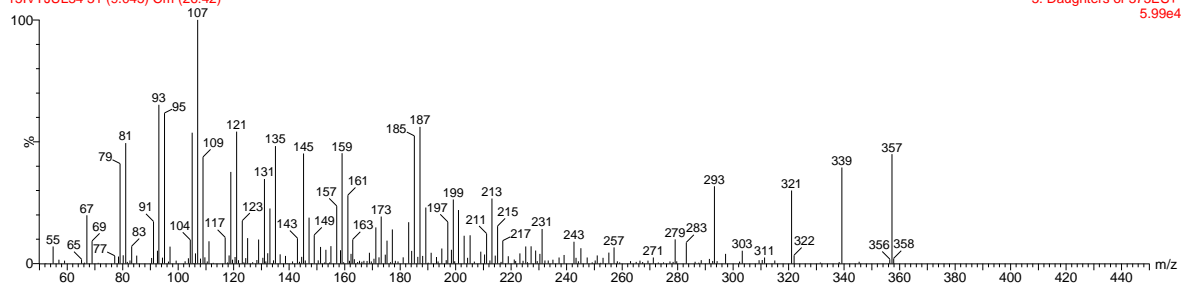

LC-ESI-MS/MS Spectrum of uzarigenin  $m/z$  375  $[M+H]^+$  recorded at 30-20ev collision energy  
[characteristic fragment ions from genin observed  $m/z$  357,339,321,293]

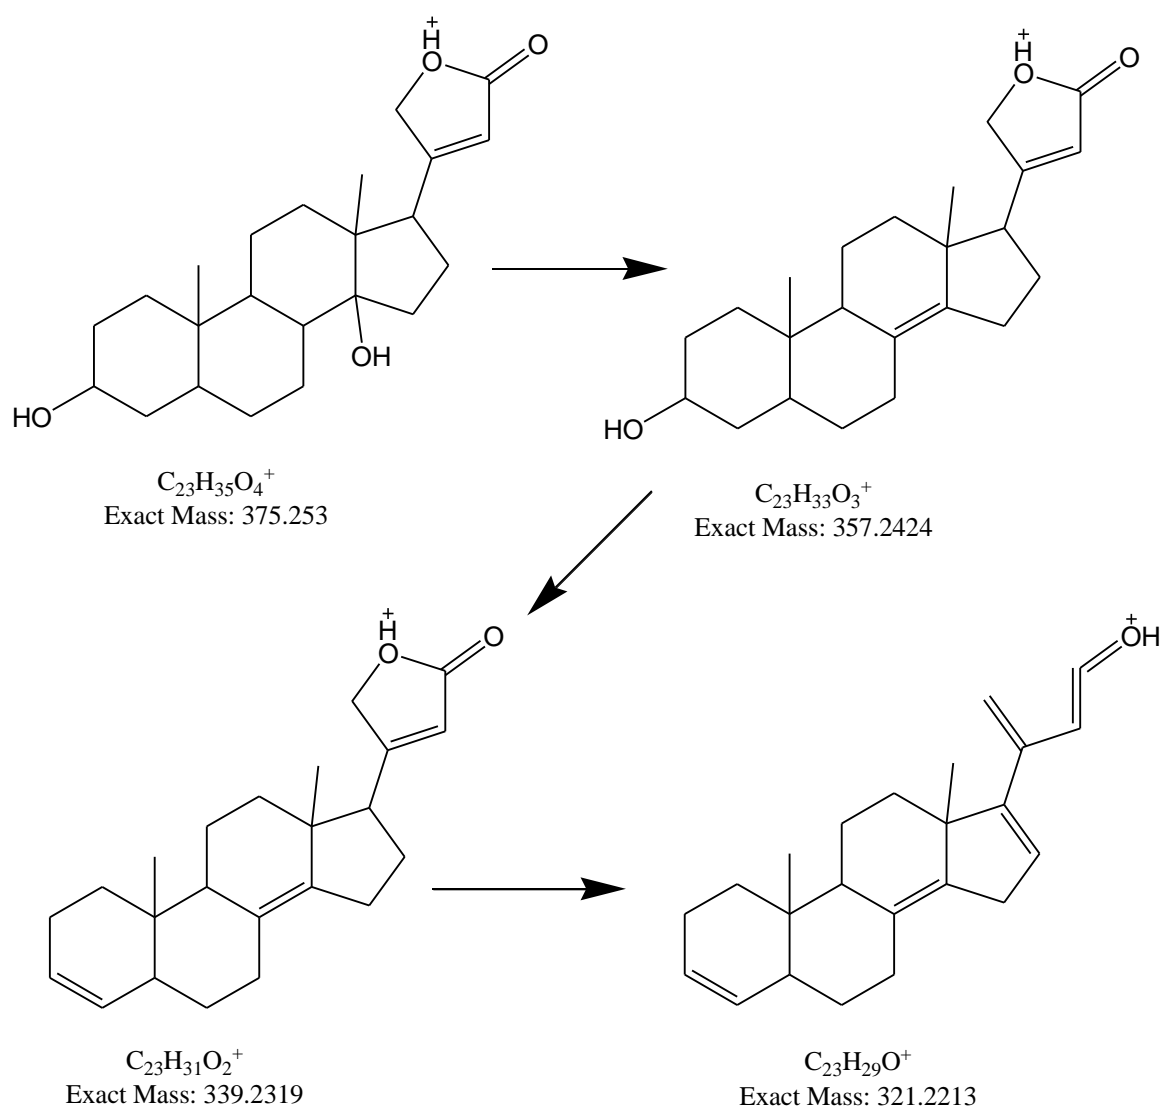

Proposed fragmentation pattern of uzarigenin  $m/z$  375  $[M+H]^+$

| S. No. | RT   | M.W. | Identified | m/z (Characteristic fragment ions of genin unit) | Genin unit | Sugar unit |
|--------|------|------|------------|--------------------------------------------------|------------|------------|
| 06     | 9.46 | 574  | Asclepin   | 387,369,351,341,333,323                          | A          | 188        |

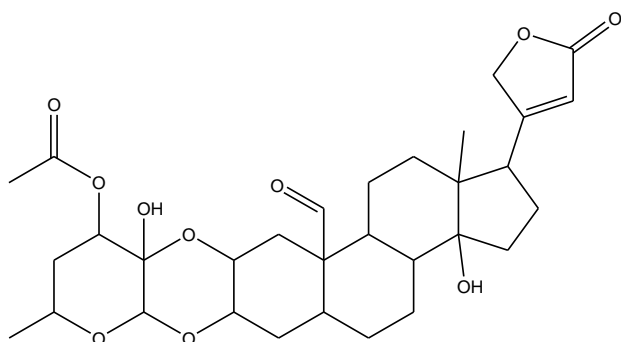

Asclepin  
 Chemical Formula: C<sub>31</sub>H<sub>42</sub>O<sub>10</sub>  
 Exact Mass: 574.2778  
 Molecular Weight: 574.6592

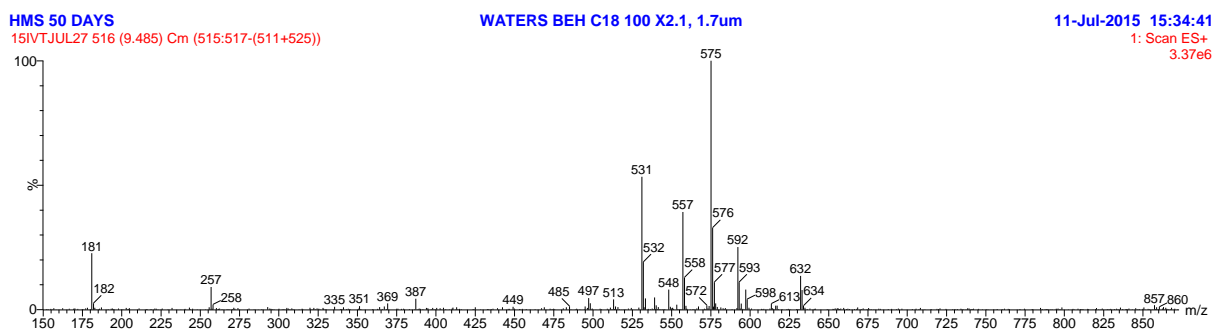

LC-ESI-MS Spectrum of asclepin m/z 575 [M+H]<sup>+</sup>

| m/z | Annotation                         | Mass difference | Confirmation remark  |
|-----|------------------------------------|-----------------|----------------------|
| 575 | [M+ H] <sup>+</sup>                | 1Da             | Molecular weight 574 |
| 592 | [M+ NH <sub>4</sub> ] <sup>+</sup> | 18 Da           | Da                   |
| 597 | [M+ Na] <sup>+</sup>               | 23 Da           |                      |

| Accurate mass observed | Annotation          | Calc. mass of asclepin [M+ H] <sup>+</sup> | Mass difference In mmu | Confirmation remark                                                                             |
|------------------------|---------------------|--------------------------------------------|------------------------|-------------------------------------------------------------------------------------------------|
| 575.2850               | [M+ H] <sup>+</sup> | 575.2051                                   | 0.0001                 | Molecular formula of the compounds C <sub>31</sub> H <sub>43</sub> O <sub>10</sub> <sup>+</sup> |

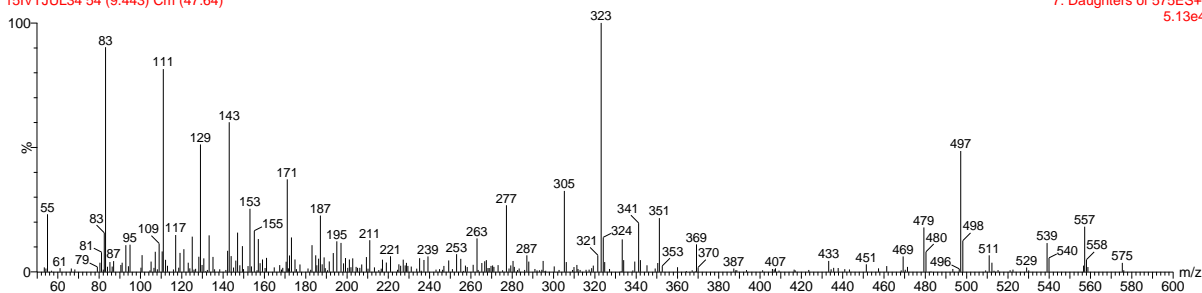

LC-ESI-MS/MS Spectrum of asclepin m/z 575 [M+H]<sup>+</sup> recorded at 30-20ev collision energy  
[characteristic fragment ions from genin observed m/z 387,369,351,341,333,323,305]

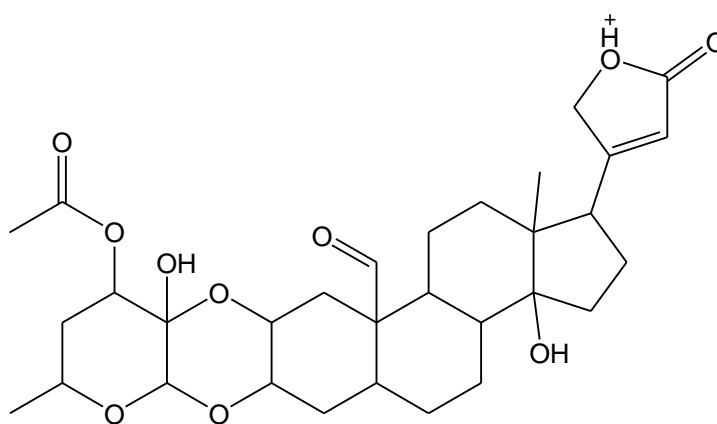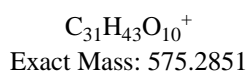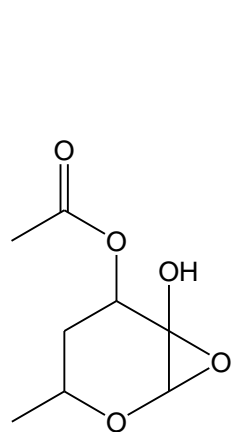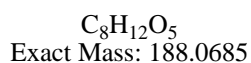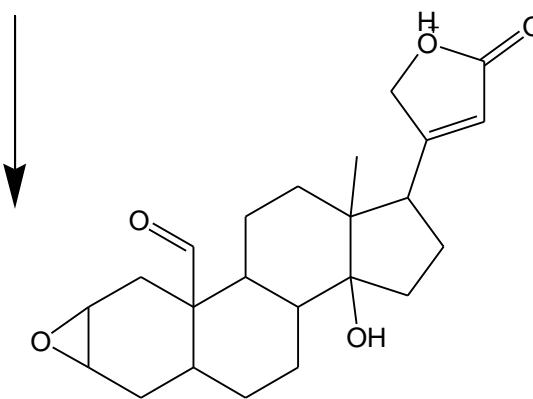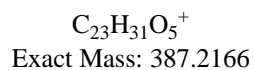

Proposed fragmentation pattern of asclepin m/z 575 [M+H]<sup>+</sup>

| S. No. | RT   | M.W. | Identified | <i>m/z</i> (Characteristic fragment ions of genin unit) | Genin unit | Sugar unit |
|--------|------|------|------------|---------------------------------------------------------|------------|------------|
| 07     | 9.47 | 530  | Ucharidin  | 369,351,341,333,323,305                                 | A          | 144        |

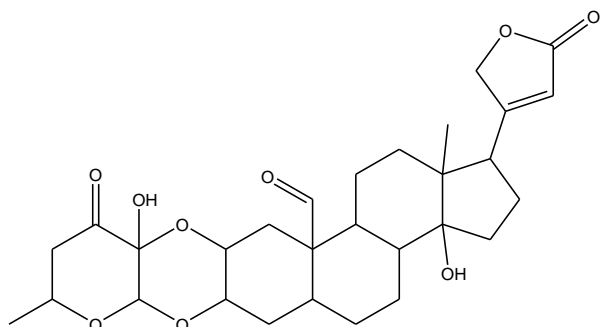

Ucharidin  
 Chemical Formula: C<sub>29</sub>H<sub>38</sub>O<sub>9</sub>  
 Exact Mass: 530.2516  
 Molecular Weight: 530.6066

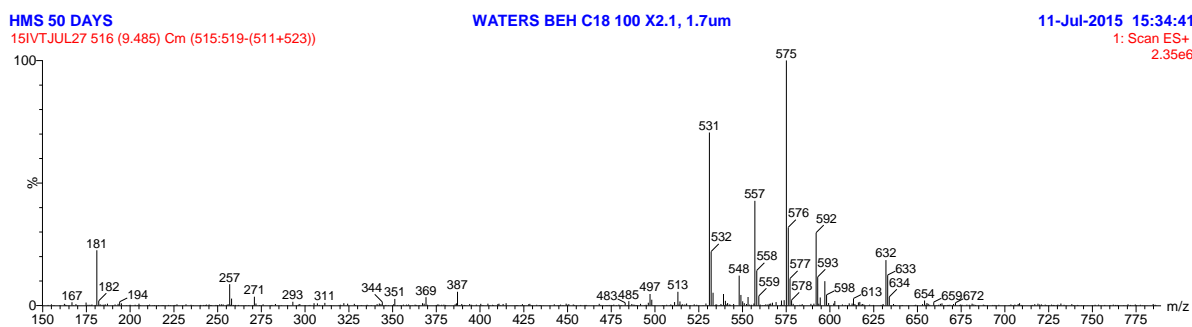

LC-ESI-MS Spectrum of uscharidin *m/z* 531 [M+H]<sup>+</sup>

| <i>m/z</i> | Annotation                         | Mass difference | Confirmation remark  |
|------------|------------------------------------|-----------------|----------------------|
| 531        | [M+ H] <sup>+</sup>                | 1Da             | Molecular weight 530 |
| 548        | [M+ NH <sub>4</sub> ] <sup>+</sup> | 18 Da           | Da                   |
| 553        | [M+ Na] <sup>+</sup>               | 23 Da           |                      |

| Accurate mass observed | Annotation          | Calc. mass of uscharidin [M+ H] <sup>+</sup> | Mass difference In mmu | Confirmation remark                                                                            |
|------------------------|---------------------|----------------------------------------------|------------------------|------------------------------------------------------------------------------------------------|
| 531.2589               | [M+ H] <sup>+</sup> | 531.2589                                     | 0.0000                 | Molecular formula of the compounds C <sub>29</sub> H <sub>39</sub> O <sub>9</sub> <sup>+</sup> |



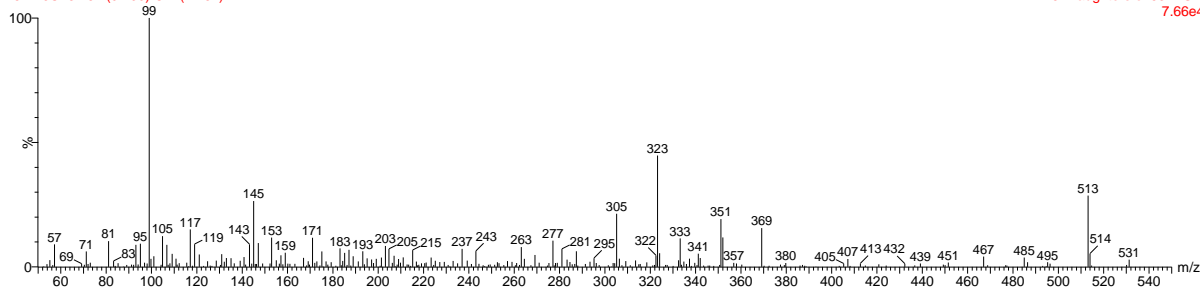

LC-ESI-MS/MS Spectrum of uscharidin m/z 531 [M+H]<sup>+</sup> recorded at 30-20ev collision energy  
[characteristic fragment ions from genin observed m/z 369,351,341,333,323,305]

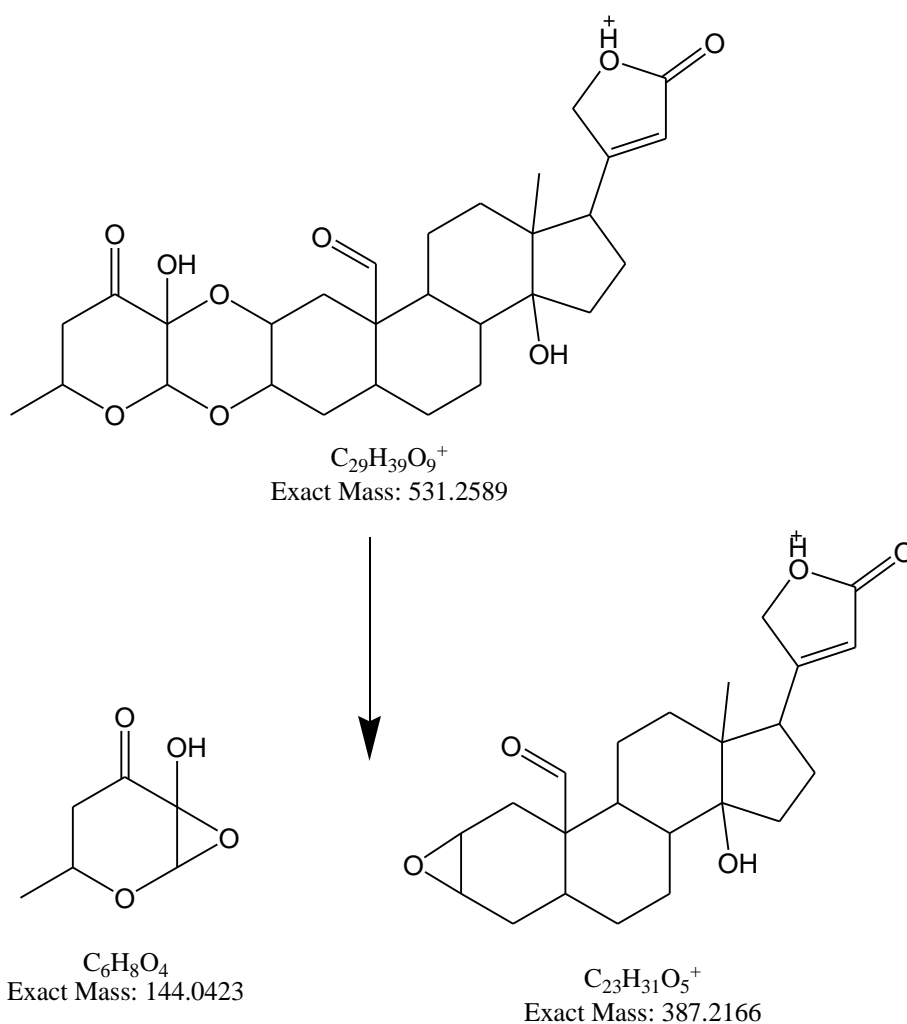

Proposed fragmentation pattern of uscharidin m/z 531 [M+H]<sup>+</sup>

| S. No. | RT   | M.W. | Identified | m/z (Characteristic fragment ions of genin unit) | Genin unit | Sugar unit |
|--------|------|------|------------|--------------------------------------------------|------------|------------|
| 08     | 9.90 | 586  | Ucharin    | 369,351,341,333,323,305                          | A          | 201        |

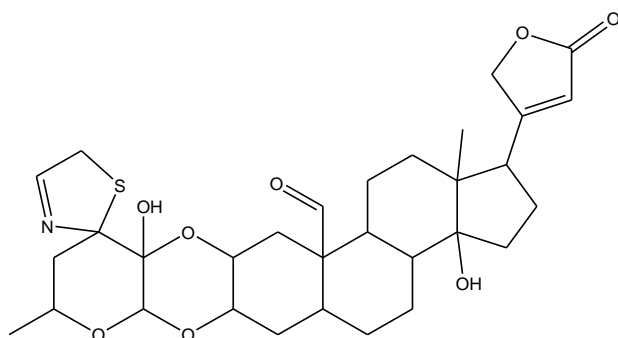

Ucharin  
 Chemical Formula:  $C_{31}H_{41}NO_8S$   
 Exact Mass: 587.2553  
 Molecular Weight: 587.7241

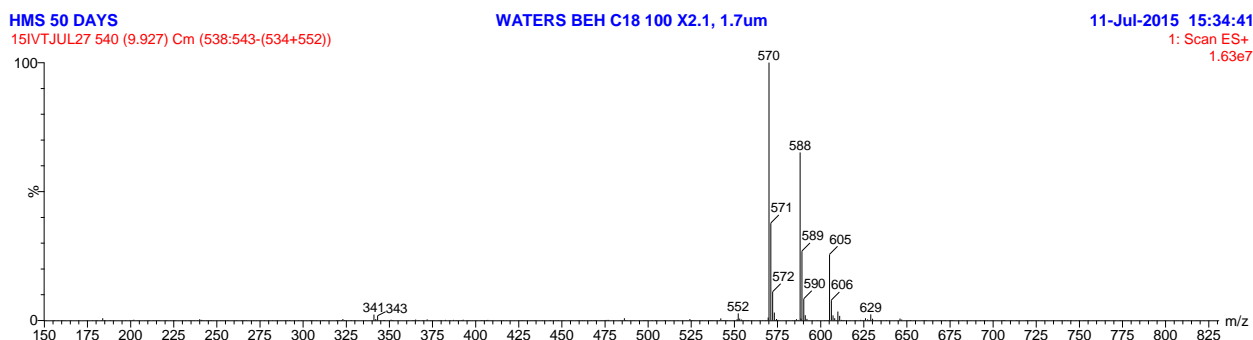

LC-ESI-MS Spectrum of uscharin m/z 588  $[M+H]^+$

| m/z | Annotation   | Mass difference | Confirmation remark  |
|-----|--------------|-----------------|----------------------|
| 588 | $[M+H]^+$    | 1Da             | Molecular weight 587 |
| 605 | $[M+NH_4]^+$ | 18 Da           | Da                   |

| Accurate mass observed | Annotation | Calc. mass of uscharin $[M+H]^+$ | Mass difference In mmu | Confirmation remark                                      |
|------------------------|------------|----------------------------------|------------------------|----------------------------------------------------------|
| 588.2629               | $[M+H]^+$  | 588.2626                         | 0.0003                 | Molecular formula of the compounds $C_{31}H_{42}NO_8S^+$ |

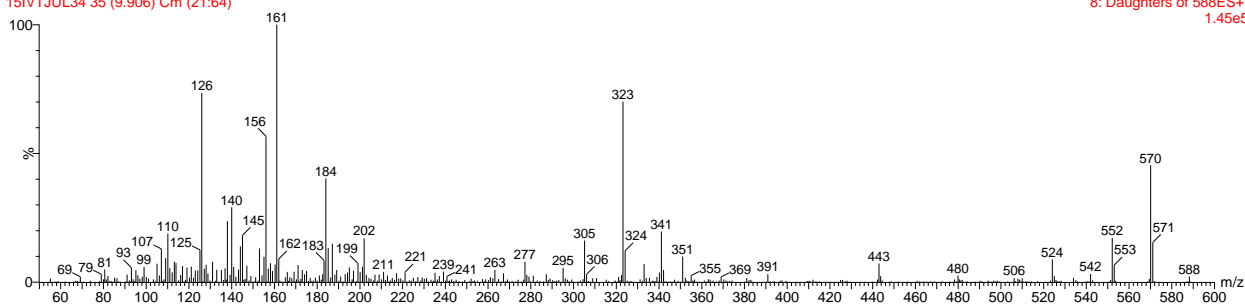

LC-ESI-MS/MS Spectrum of uscharin  $m/z$  588  $[M+H]^+$  recorded at 30-20ev collision energy  
[characteristic fragment ions from genin observed  $m/z$  369,351,341,333,323,305]

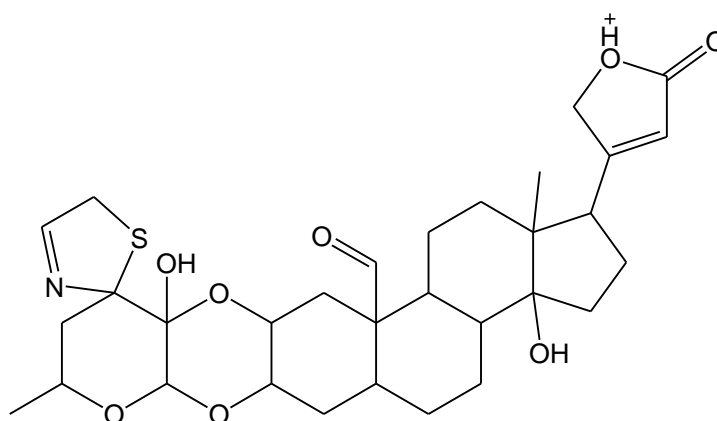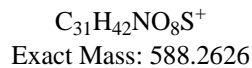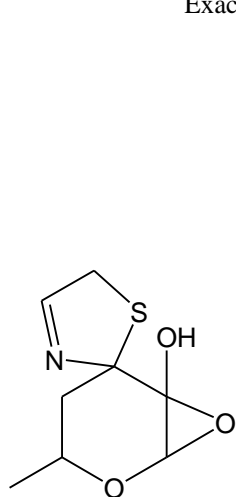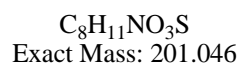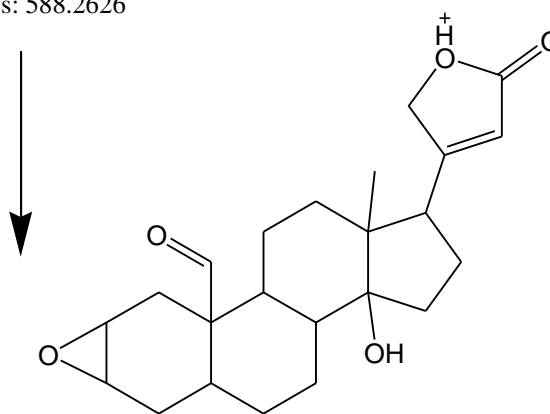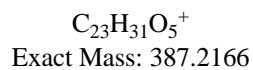

Proposed fragmentation pattern of uscharin  $m/z$  588  $[M+H]^+$

**Supplementary Table 1. Relative peak area intensity of metabolites measured by UPLC/Q-TOF MS.**

| S.No | Metabolite      | Area (Mean+-SD) |             |             |              |               |               |                |
|------|-----------------|-----------------|-------------|-------------|--------------|---------------|---------------|----------------|
|      |                 | 3 month         | 6 month     | 9 month     | 12 month     | Leaf(3 month) | Stem(3 month) | Root( 3 month) |
| 1    | Uzarigenin      | 146941±5673     | 110247±4309 | 117506±8178 | 137993±6232  | 13194±2540    | 192415±10980  | 8212±1342      |
| 2    | Calotropagenin  | 40729±5601      | 15062±4442  | 33236±5463  | 12365±2343   | 24302±5608    | 57545±14327   | 15615±1450     |
| 3    | Coroglaucigenin | 18768±2567      | 17318±2678  | 3998±986    | 1564±543     | 5261±634      | 1282±324      | 256±99         |
| 4    | Frugoside       | 233200±9989     | 55684±4532  | 82267±6533  | 10457±1053   | 26937±4538    | 389985±25609  | 62190±4390     |
| 5    | Uscharidin      | 114256±5523     | 40964±6732  | 35717±6623  | 75487±2365   | 103472±7908   | 266356±11123  | 38905±16700    |
| 6    | Uscharin        | 1810726±4536    | 333477±7743 | 592055±5633 | 1346303±3783 | 857564±85750  | 1500333±15009 | 952749±98780   |
| 7    | Ascelpin        | 113935±2323     | 47581±4288  | 61529±6234  | 88052±7723   | 59291±5532    | 135970±43308  | 73342±8900     |
| 8    | Calactin        | 297240±5678     | 88170±9823  | 128451±9982 | 257425±2673  | 121638±1800   | 376483±35876  | 172995±9990    |

**Supplementary Table 2- Plausible Unigenes involved in cardiac glycosides biosynthesis.**

| S.No. | Name of Enzyme                                                                                           | EC no.             | Unigene ID              | No. of transcripts |
|-------|----------------------------------------------------------------------------------------------------------|--------------------|-------------------------|--------------------|
| 1     | DXS, 1-deoxy-D-xylulose-5-phosphate synthase                                                             | EC:2.2.1.7         | 16078,11240             | 2                  |
| 2     | DXR, 1-deoxy-D-xylulose-5-phosphate reductoisomerase                                                     | EC:1.1.1.267       | 2570                    | 2                  |
| 3     | MCT, 2-C-methyl-D-erythritol 4-phosphate cytidyltransferase (ISP)                                        | EC:2.7.7.60        | 3403                    | 1                  |
| 4     | CMK, 4-diphosphocytidyl-2-C-methyl-D-erythritolkinase(4diphosphocytidyl-2C-methyl-D-erythritol synthase) | EC:2.7.1.148       | 6895                    | 1                  |
| 5     | MDS, 2-C-methyl-D-erythritol 2,4-cyclodiphosphate synthase                                               | EC:4.6.1.12        | 18970                   | 1                  |
| 6     | HDS, 4-hydroxy-3-methylbut-2-en-1-yl diphosphate synthase                                                | EC:1.17.7.1        | 1922                    | 2                  |
| 7     | HDR, 4-hydroxy-3-methylbut-2-enyl diphosphate reductase                                                  | EC:1.17.1.2        | 1156                    | 1                  |
| 8     | AACT, acetyl-CoA C-acetyltransferase                                                                     | EC:2.3.1.9         | 12190                   | 2                  |
| 9     | HMGS, hydroxymethylglutaryl-CoA synthase                                                                 | EC:2.3.3.10        | 1140                    | 4                  |
| 10    | HMGR, hydroxymethylglutaryl-CoA reductase                                                                | EC:1.1.1.34        | 1054                    | 4                  |
| 11    | MK, mevalonate kinase                                                                                    | EC:2.7.1.36        | 8210                    | 3                  |
| 12    | PMK, phosphomevalonate kinase                                                                            | EC:2.7.4.2         | 1929                    | 2                  |
| 13    | MPD, diphosphomevalonate decarboxylase                                                                   | EC:4.1.1.33        | 2203                    | 5                  |
| 14    | IDI, isopentenyl-diphosphate delta-isomerase                                                             | EC:5.3.3.2         | 6514                    | 7                  |
| 15    | GGPPS1, geranylgeranyl pyrophosphate synthase 1                                                          | EC:2.5.1.1/10      | 568                     | 6                  |
| 16    | FDPS1, farnesyldiphosphate synthase 1                                                                    | EC:2.5.1.1<br>2/10 | 568                     | 6                  |
| 17    | SQS1, squalene synthase                                                                                  | EC:2.5.1.21        | 12515                   | 4                  |
| 18    | SMO, squalene monooxygenase                                                                              | EC 1.14.13.13<br>2 | 3321,811,18<br>064      | 12                 |
| 19    | CAS1, cycloartenol synthase 1                                                                            | EC:5.4.99.8        | 2371,8367               | 10                 |
| 20    | SMT1, sterol 24-C-methyltransferase                                                                      | EC:2.1.1.41        | 7133                    | 2                  |
| 21    | CPI1, cyclopropyl isomerise;CPI1; cycloeucalenol cycloisomerase                                          | EC:5.5.1.9         | 807                     | 7                  |
| 22    | CYP51G1, cytochrome P450, family 51,subfamily A (sterol 14-demethylase)                                  | EC:1.14.13.70      | 8978                    | 4                  |
| 23    | FK, delta14-sterol reductase                                                                             | EC:1.3.1.70        | 8353                    | 7                  |
| 24    | HYD1, cholestenol delta-isomerase                                                                        | EC:5.3.3.5         | 3051                    | 1                  |
| 25    | SMT2, sterol methyltransferase 2                                                                         | EC:2.1.1.143       | 2514                    | 1                  |
| 26    | STE1, C-5 sterol desaturase                                                                              | EC:1.14.2.6        | 172                     | 4                  |
| 27    | DWF5, sterol delta7 reductase                                                                            | EC:1.3.1.21        | 1261                    | 4                  |
| 28    | DWF1, delta24-sterol reductase,(delta14-sterol reductase)                                                | EC:1.3.1.72        | 2522                    | 1                  |
| 29    | 3βHSD, 3-beta-hydroxysteroid-dehydrogenase                                                               | -                  | 5463, 14271,<br>845,303 | 15                 |
| 30    | 5βPOR, progesterone 5β-reductase                                                                         | -                  | 1572                    | 1                  |
| 31    | GH, glucohydrolase                                                                                       | -                  | 9455,12988              | 4                  |

|    |                                                                                                       |   |                                                                                                                                                                                                                                                                                                                                                                                                                                                                   |     |
|----|-------------------------------------------------------------------------------------------------------|---|-------------------------------------------------------------------------------------------------------------------------------------------------------------------------------------------------------------------------------------------------------------------------------------------------------------------------------------------------------------------------------------------------------------------------------------------------------------------|-----|
| 32 | GT, glycosyltransferase/glucuronosyltransferase<br>UGT,UDPglycosyltransferase/glucuronosyltransferase | - | 9455,12988,<br>16256,889,7<br>94,2312,682<br>7,15669,197<br>1,6604,9044,<br>14107,16749<br>,6297,14001,<br>3348,11001,<br>13521,16372<br>,2170,8004,5<br>351,9397,10<br>21,19905,38<br>24,4441,968<br>4,4803,8678,<br>22663,13316<br>,7329,4933,5<br>124,3223,85<br>78,9784,441<br>7,8515,6875,<br>10638,173,3<br>747,5219,51<br>7,7752,1021<br>7,10597,513<br>0,2166,1536<br>6,5087,2314,<br>4704,4060,5<br>333,7748,11<br>734,1133,49<br>51,7455,165<br>03,6830 | 125 |
| 33 | Monooxygenases                                                                                        | - | 248,426,429,<br>591,619,811,<br>1466,1647,1<br>784,2419,29<br>92,4204,588<br>0,6582,7188,<br>13087,14352<br>,14542,1671<br>9,11371,820<br>6,7319,7565,<br>7582,2206,8<br>421,8498,89<br>14,9235,100<br>89,10751,11<br>372,12547,1<br>2715,12768,<br>12818,17161<br>,18175,1366<br>6,2994.                                                                                                                                                                         | 90  |

**Supplementary table 3-** Primer sequences used in qRT-PCR analysis

| <b>Name</b>  | <b>Forward Primer</b>      | <b>Reverse Primer</b>       |
|--------------|----------------------------|-----------------------------|
| <b>ACTIN</b> | GCGTCGGAGGTGAGAGAG         | AGAGTGTACGGGCCATGC          |
| <b>DXS</b>   | TGCAGCTGCCATAGACGATA       | TCCTATCCCATTTCACGAG         |
| <b>DXR</b>   | CCCTGATGCTGTCACTGTTG       | CGCTGCTACTGTTGGCTTTA        |
| <b>MCT</b>   | TCGTTTATCCAGAAGGCAGTC      | TTCACAACAGCACCGGAAG         |
| <b>CMK</b>   | TGATCTAGAACATCCTGCTTTTGA   | ACACGCTGCTTCAACCTTTT        |
| <b>MDS</b>   | TCGTTTATCCAGAAGGCAGTC      | TTCACAACAGCACCGGAAG         |
| <b>HDS</b>   | ACAATCAGAGTGTCTCTTACTGAACC | TGCTAACCTTCTACAGGGGTCT      |
| <b>HDR</b>   | CAGACTCGTCGGTGGTAGC        | CGGAAACCTGTGTCTGTACG        |
| <b>AACT</b>  | CAGTGCGAATTTAGGCCAAG       | TTAGGAATACCAGCGCCAAG        |
| <b>HMGS</b>  | TTTCTCCTACTTGCATCCAG       | TTCCCTTTGCTTGCTCCA          |
| <b>HMGR</b>  | CCATTTCGCCCTCTCCTAA        | CTTCTGAAGAATGCGAGGTGA       |
| <b>MK</b>    | ACAAGTTGTCTTCCAAGTTGACTG   | TGGCAATAGTGTCAACACACAG      |
| <b>PMK</b>   | CCCGTCAATGGTAGGAGCTA       | TTCTAGAGAATTTTGGGGGTCA      |
| <b>MPD</b>   | TTCCCATCTCTGTACCACCAC      | CCACATACGATCCTGCGTAA        |
| <b>IDI</b>   | ACCGGCGGTTACACCTATC        | GCAGCAACAGAAGAAAAGCA        |
| <b>SQS</b>   | TAAGGTTTCGAGGAGCTTTGC      | GCGTCCCGAAGATCAGTATC        |
| <b>SMO</b>   | AACATGCGCCATCCTTTAAC       | GATCACGAAGGACAACAATGTCT     |
| <b>SQE</b>   | CTTTTCTTGTTTCTTTATCTGGGTTT | TGGTTCAAATTTAGAAGAAAGCTTAGA |
| <b>CAS 1</b> | ACTGGCGGAGATCGAAAAG        | CGCTGTGCTTTTTCTCGAAT        |
| <b>SMT1</b>  | CCTCCGGGAAAGCATTAAAG       | CCAGGTCTCAGGCCTAGTTG        |
| <b>CPI1</b>  | CACAGTTTTGGGTGCTTCT        | TGAGTGAGGAGAAAAGTAGTATGTGG  |
| <b>CYP</b>   | GCCGGAGCATTCTCATACAT       | TGGCTCTCCAAGACATCCAT        |
| <b>HYD1</b>  | GAAAATCTCAAAGTTGGATAGGATTC | CATGTGGGTTAGGCCAGTG         |
| <b>SMT2</b>  | AAATGGCCGTGGATCTATTG       | CGCATCCAACATCGAGAAT         |
| <b>STE 1</b> | TGCAAATGTCTGTTGCAATG       | TCACGTATTCAGAGACTGTAGGAAG   |
| <b>DWF 5</b> | GAAAAAGGGTTGAGGGTCCTA      | TGCTTGCAAACCATTAGCC         |
| <b>DWF1</b>  | GACAAGGAGAGGATGGTTGC       | CCGGGATATCTGACCCATATT       |
| <b>POR</b>   | ATGAATCTAGTTGGTACCATTGTGT  | GGAAACTTCAATGGCACTCC        |
| <b>LS</b>    | TTTGATCCTAATGCCGGAAC       | ATTCCCGGCGAACTCTTT          |
| <b>GH</b>    | TTGGTGACGAGAACGAGGTT       | ACCAAATTCCCATTGTACGC        |
| <b>GT</b>    | CCCTGTAAATTGCATGCTGA       | GGAGTGTTAAGGAAAGTGACGTG     |
| <b>MO</b>    | TCCCACCAAGAACTTCCAC        | TGTGAATGTGTCCGATGATTG       |

**Supplementary Table no 4-** Expanded names of genes for figures 6 and 7.

| <b>Abbreviation</b> | <b>Full name</b>                                            |
|---------------------|-------------------------------------------------------------|
| <b>DXS</b>          | 1-Deoxy-D-xylulose-5-phosphate synthase                     |
| <b>DXR</b>          | 1-Deoxy-D-xylulose-5-phosphate reductoisomerase             |
| <b>MCT</b>          | 2-C-methyl-D-erythritol4-phosphate cytidyltransferase       |
| <b>CMK</b>          | 4-Diphosphocytidyl-2-C-methyl-D-erythritolkinase;           |
| <b>MDS</b>          | 2-C-methyl-D-erythritol 2,4-cyclodiphosphate synthase       |
| <b>HDS</b>          | 4-Hydroxy-3-methylbut-2-en-1-yl diphosphate synthase        |
| <b>HDR</b>          | 4-Hydroxy-3-methylbut-2-enyl diphosphate reductase          |
| <b>AACT</b>         | AcetylCoAacetyltransferase                                  |
| <b>HMGS</b>         | HydroxymethylglutarylCoAsynthase                            |
| <b>HMGR</b>         | Hydroxymethylglutaryl-CoA reductase                         |
| <b>MK</b>           | Mevalonate kinase                                           |
| <b>PMK</b>          | Phosphomevalonate kinase                                    |
| <b>MPD</b>          | Diphosphomevalonate decarboxylase                           |
| <b>IDI</b>          | Isopentenyl-diphosphate delta-isomerase                     |
| <b>GGPPS1</b>       | Geranylgeranyl pyrophosphate synthase 1                     |
| <b>FDPS1</b>        | Farnesyl diphosphate synthase 1                             |
| <b>SQS</b>          | Squalene synthase                                           |
| <b>SMO</b>          | Squalene monooxygenase                                      |
| <b>CAS</b>          | Cycloartenol synthase                                       |
| <b>SMT1</b>         | Sterol 24-C-methyltransferase                               |
| <b>CPI1</b>         | Cyclopropyl isomerase                                       |
| <b>CYP51G1</b>      | Cytochrome P450, family 51,subfamily A(sterol14demethylase) |
| <b>FK</b>           | Delta14-sterol reductase                                    |
| <b>HYD</b>          | Cholestenol delta-isomerase                                 |
| <b>SMT2</b>         | Sterol methyltransferase 2                                  |
| <b>STE</b>          | C-5 sterol desaturase                                       |
| <b>DWF5</b>         | Sterol delta7 reductase                                     |
| <b>DWF1</b>         | Delta24-sterolreductase                                     |
| <b>3βHSD</b>        | 3beta-hydroxy-steroid-dehydrogenase                         |
| <b>POR</b>          | Progesterone reductase                                      |
| <b>OR</b>           | Oxidoreductase                                              |
| <b>MaT</b>          | Malonyltransferase                                          |
| <b>HOX</b>          | Hydroxylase                                                 |
| <b>GH</b>           | Glucohydrolase                                              |
| <b>MO</b>           | Monoxygenases                                               |
| <b>GT</b>           | Glycosyltransferase/glucuronosyltransferase                 |
| <b>UGT</b>          | UDP-glycosyltransferase/ glucuronosyltransferase            |
